# Supplementary material
Source: publisher site journal article supplement (https://www.dovepress.com/article/380390)
Supplement: Supplementary file 1 [file get_supplementary_file.php]

**Supplementary Figure 1. Indicators of cancer cure\* : cure fraction and time to cure**

**a. Cure Fraction:** Proportion of cancer patients who are expected to reach the same death rates as the general population

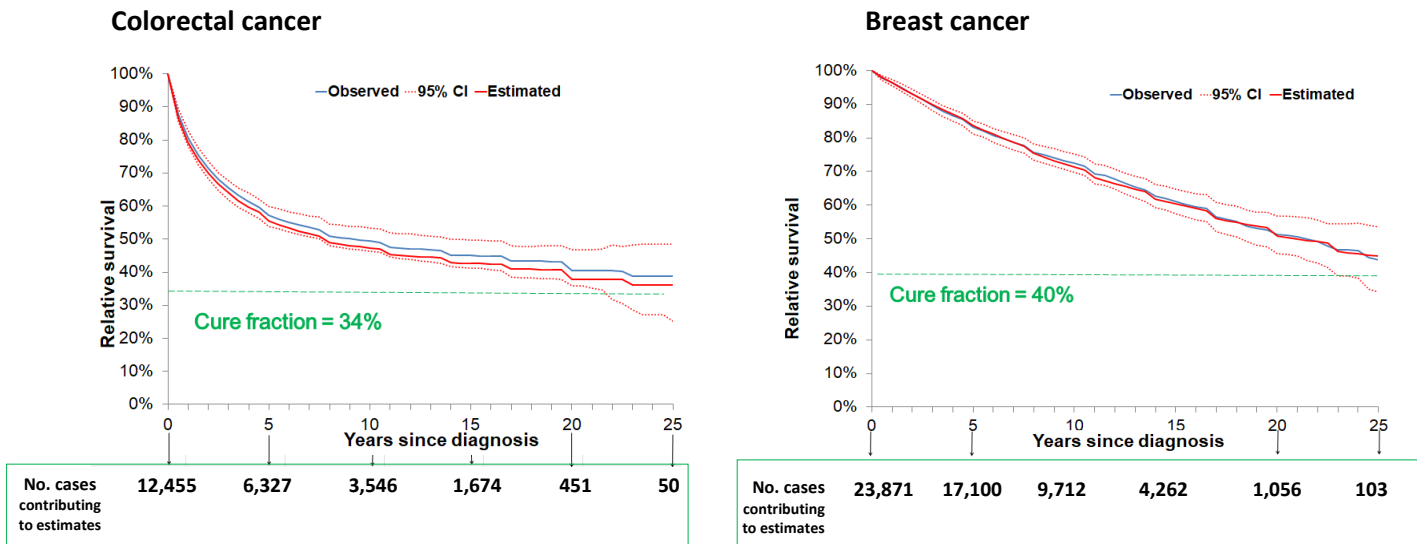

**b. Time to cure:** Years after cancer diagnosis necessary to eliminate or make negligible excess mortality due to cancer

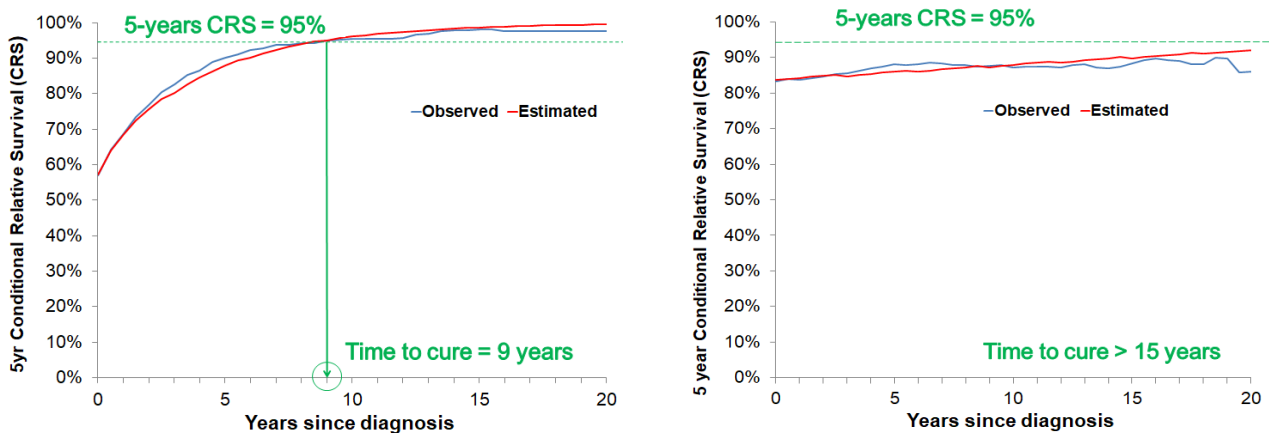

\* Examples from Italian cancer patients (1988-1990), diagnosed at age 65-74, and followed for 25 years after diagnosis, adapted from Ref. 11
